# Supplementary material for: Development and evaluation of physiologically based pharmacokinetic drug-disease models for predicting captopril pharmacokinetics in chronic diseases
Source: PubMed Central journal article supplement (PMC8060346; doi:10.1038/s41598-021-88154-2), 2021-04-21
Supplement: 41598_2021_88154_MOESM1_ESM.pdf [file 41598_2021_88154_MOESM1_ESM.pdf]

*Supplementary Material*

**Development and evaluation of physiologically based pharmacokinetic drug-disease models for predicting captopril pharmacokinetics in chronic diseases**

**Muhammad F. Rasool<sup>1\*</sup>, Shazia Ali<sup>2</sup>, Sundus Khalid<sup>1</sup>, Ramsha Khalid<sup>1</sup>, Abdul Majeed<sup>1</sup>, Imran Imran<sup>3</sup>, Hamid Saeed<sup>4</sup>, Muhammad Usman<sup>5</sup>, Mohsin Ali<sup>6</sup>, Amer S Alali<sup>7</sup>, Abdullah F AlAsmari<sup>7</sup>, Nemat Ali<sup>8</sup>, Ali Mohammed Asiri<sup>8</sup>, and Faleh Alqahtani<sup>8\*</sup>**

<sup>1</sup>Department of Pharmacy Practice, Faculty of Pharmacy, Bahauddin Zakariya University, 60800, Multan, Pakistan

<sup>2</sup>Department of Pharmaceutics, Faculty of Pharmacy, Bahauddin Zakariya University, 60800, Multan, Pakistan

<sup>3</sup>Department of Pharmacology, Faculty of Pharmacy, Bahauddin Zakariya University, 60800, Multan, Pakistan

<sup>4</sup>University College of Pharmacy, Allama Iqbal Campus, University of the Punjab, 54000, Lahore, Pakistan

<sup>5</sup>Institute of Pharmaceutical Sciences, University of Veterinary and Animal Sciences, Lahore

<sup>6</sup>Department of Pharmacy Practice, Faculty of Pharmaceutical Sciences Government College University, 38000, Faisalabad

<sup>7</sup>Department of Pharmaceutics, College of Pharmacy, Prince Sattam bin Abdulaziz University, Al-Kharj 11942, Saudi Arabia

<sup>8</sup>Department of Pharmacology and Toxicology, College of Pharmacy, King Saud University, Riyadh 11451, Saudi Arabia

\* Correspondence: [fawadrasool@bzu.edu.pk](mailto:fawadrasool@bzu.edu.pk), [Afaleh@ksu.edu.sa](mailto:Afaleh@ksu.edu.sa)

## Supplementary Methods

### The minimal physiological based pharmacokinetic drug distribution model (MPDDM)

The MPDDM is one of the models that have been implemented in the program Simcyp. It is a lumped PBPK model that has four compartments and is capable of predicting systemic, portal vein and liver concentrations of the administered drug. This model has a single adjusting compartment (SAC), which is a non-physiological compartment that allows changes in the systemic drug concentration. The MPDDM is usually used for predicting drug distribution of drugs with low volume of distribution ( $V_d$ ). The structure of the MPDDM can be seen in Supplementary Figure S1.

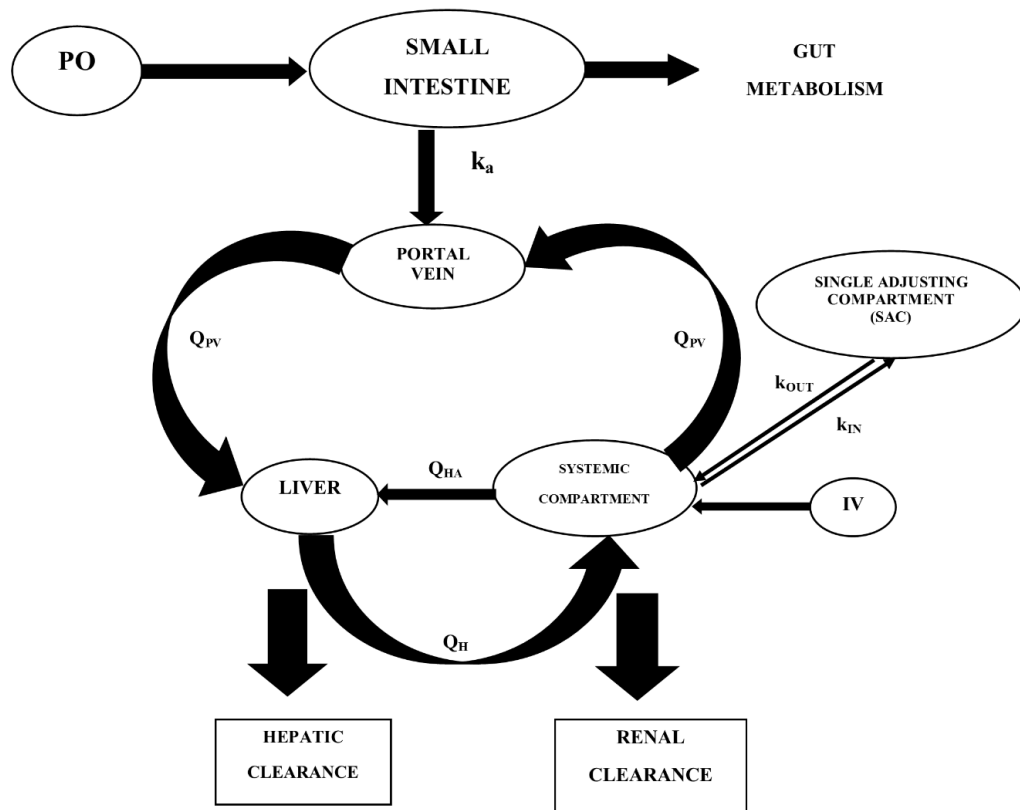

Supplementary Figure S1: Minimal PBPK drug distribution model (MPDDM)

$k_{in}$  and  $k_{out}$  are first order rate constants, IV: intravenous,  $k_a$  is the absorption rate constant and  $Q$  is the blood flow

In MPDDM the apparent volume of the systemic compartment ( $V_{SYS}$ ) is determined by using the following equation,

$$V_{SYS} = V_{ss} - V_H - V_{SAC}$$

Where  $V_{SS}$  is volume of the volume of distribution at steady state,  $V_H$  is the apparent hepatic volume and  $V_{SAC}$  is the apparent volume related to the SAC.

The users can use input values for  $k_{in}$  (or  $CL_{in}$ ),  $k_{out}$  (or  $CL_{out}$ ) or  $Q$  and  $V_{SAC}$  for predicting drug distribution in the MPDDM.

The model input values for the first order rate constants,  $k_{in}$  and  $k_{out}$  were optimized manually by comparing observed and predicted systemic captopril concentration profiles after intravenous (iv) application (Supplementary Table S1). The model input values for  $k_{in}$  and  $k_{out}$  were changed manually and their initial values were derived after comparing observed and predicted systemic concentrations profiles using visual predictive checks (Supplementary Figure S2). The final selection of model input values for  $k_{in}$  and  $k_{out}$  (0.25 and 0.25) were based on the comparison of observed and predicted elimination rate constants ( $k_e$ ), area under the curve (AUC) and maximum systemic concentration ( $C_{max}$ ) after intravenous captopril administration after iv captopril administration.

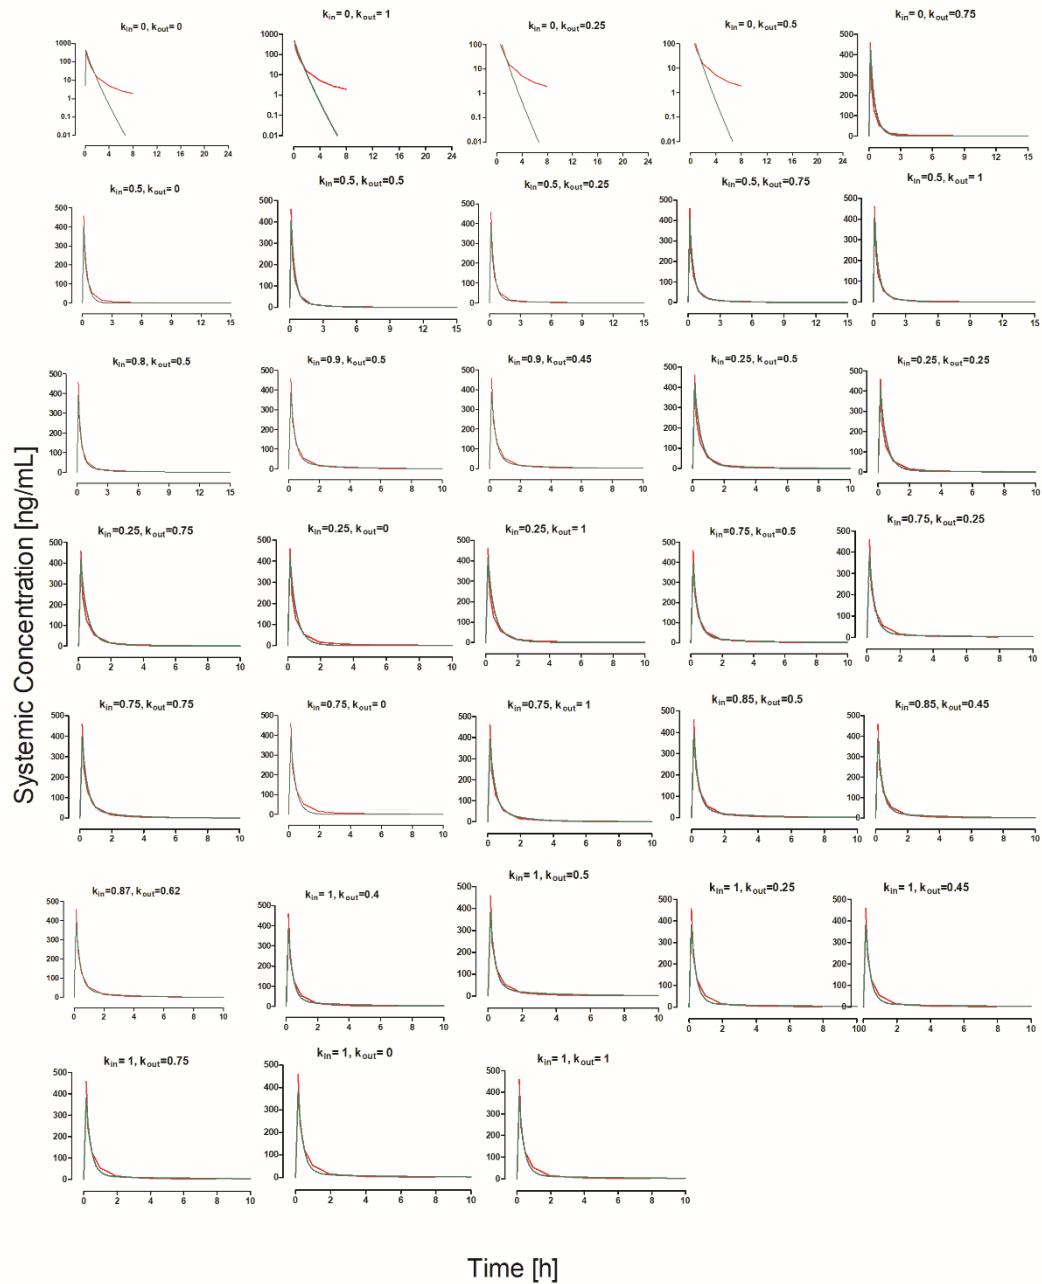

**Supplementary Figure S2.** Comparison of observed and predicted captopril systemic concentration profiles after intravenous application by changing first order rate constants ( $k_{in}$  and  $k_{out}$ )

*Red line shows the observed systemic concentration data after administration of iv captopril<sup>1</sup> and the green line shows the predicted systemic captopril concentration.*

**Supplementary Table S1.** Effect of changing first order rate constants on predicted elimination rate constant ( $k_e$ ), area under the curve (AUC) and maximum systemic concentration  $C_{max}$  after intravenous captopril administration.

| $k_{in}$ | $k_{out}$ | $k_e$    |           | AUC $0\text{-inf}$ |           | $C_{max}$ |           |
|----------|-----------|----------|-----------|--------------------|-----------|-----------|-----------|
|          |           | Observed | Predicted | Observed           | Predicted | Observed  | Predicted |
| 0        | 0         | 0.2519   | 1.3809    | 279.21             | 281.5639  | 458.729   | 425.5773  |
| 0        | 1         |          | 1.4094    |                    | 279.7714  |           | 428.6469  |
| 0        | 0.5       |          | 1.3923    |                    | 280.1926  |           | 428.6469  |
| 0        | 0.25      |          | 1.3923    |                    | 280.1926  |           | 428.6469  |
| 0        | 0.75      |          | 1.3923    |                    | 280.1926  |           | 428.6469  |
| 0.5      | 0         |          | 1.8805    |                    | 236.2172  |           | 404.7984  |
| 0.5      | 0.5       |          | 0.3726    |                    | 287.5342  |           | 405.6259  |
| 0.5      | 0.25      |          | 0.1946    |                    | 287.2145  |           | 405.1810  |
| 0.5      | 0.75      |          | 0.5343    |                    | 287.8020  |           | 406.0247  |
| 0.5      | 1         |          | 0.6758    |                    | 287.9879  |           | 406.3262  |
| 0.8      | 0.5       |          | 0.3286    |                    | 285.0579  |           | 391.9403  |
| 0.9      | 0.5       |          | 0.3167    |                    | 284.2586  |           | 387.4984  |
| 0.9      | 0.45      |          | 0.2883    |                    | 287.87    |           | 387.38    |
| 0.25     | 0.5       |          | 0.4327    |                    | 288.7976  |           | 417.2341  |
| 0.25     | 0.25      |          | 0.2286    |                    | 288.4666  |           | 417.0415  |
| 0.25     | 0.75      |          | 0.6225    |                    | 288.8544  |           | 417.4398  |
| 0.25     | 0         |          | 1.6432    |                    | 260.2917  |           | 416.8124  |
| 0.25     | 1         |          | 0.7866    |                    | 288.8304  |           | 417.6314  |
| 0.75     | 0.5       |          | 0.3363    |                    | 287.2020  |           | 394.1901  |
| 0.75     | 0.25      |          | 0.3373    |                    | 287.2135  |           | 394.1901  |
| 0.75     | 0.75      |          | 0.4805    |                    | 287.3411  |           | 394.7606  |
| 0.75     | 0         |          | 2.1338    |                    | 217.9203  |           | 393.0449  |
| 0.75     | 1         |          | 0.6047    |                    | 287.3802  |           | 395.3318  |
| 0.85     | 0.5       |          | 0.3235    |                    | 286.8941  |           | 389.7398  |
| 0.85     | 0.45      |          | 0.2937    |                    | 286.8685  |           | 389.5950  |
| 0.87     | 0.62      |          | 0.3892    |                    | 286.8569  |           | 389.1598  |
| 1        | 0.4       |          | 0.2500    |                    | 286.2628  |           | 382.6409  |
| 1        | 0.5       |          | 0.3068    |                    | 286.3016  |           | 382.9126  |
| 1        | 0.25      |          | 0.1612    |                    | 286.1123  |           | 382.1795  |
| 1        | 0.45      |          | 0.2786    |                    | 286.3097  |           | 382.8418  |
| 1        | 0.75      |          | 0.4380    |                    | 286.4415  |           | 383.7049  |
| 1        | 0         |          | 2.7669    |                    | 201.6758  |           | 381.1746  |
| 1        | 1         | 0.5539   | 286.4486  | 384.4182           |           |           |           |

## Reference

- 1 Creasey, W., Morrison, R., Singhvi, S. & Willard, D. Pharmacokinetics of intravenous captopril in healthy men. *European journal of clinical pharmacology* **35**, 367-370 (1988).
